# Supplementary material for: Validation of an obstetric comorbidity index in an external population
Source: PubMed Central journal article supplement — BJOG. 2015 Jan 5;122(13):1748–55. doi: 10.1111/1471-0528.13254 (PMC5006847; doi:10.1111/1471-0528.13254), 2015-01-05
Supplement: BJO-122-1748-s001.pdf [file BJO-122-1748-s001.pdf]

**Appendix S1. ICD Diagnosis Codes for Comorbidities**

| <b>Comorbidity</b>               | <b>ICD-9-CM Code<br/>(As defined by Bateman et al<br/>(6))</b>       | <b>ICD-10-CA Code</b>                                                   |
|----------------------------------|----------------------------------------------------------------------|-------------------------------------------------------------------------|
| Alcohol Abuse                    | 291, 303, 305.0                                                      | F10                                                                     |
| Asthma                           | 493                                                                  | J44, J45                                                                |
| Cardiac Valvular Disease         | 394-397, 424                                                         | I05-I09, I34-I39                                                        |
| Chronic Congestive Heart Failure | 428.22, 428.23, 428.32, 428.33, 428.42, 428.43                       | I50.0                                                                   |
| Chronic Ischemic Heart Disease   | 412-414                                                              | I20, I25                                                                |
| Chronic Renal Disease            | 581-583, 585, 587, 588, 646.2                                        | N02.2, N03-N05, N08, N17.1, N17.2, N18, N25, O26.8                      |
| Congenital Heart Disease         | 745.0-747.4, 648.5                                                   | Q20-Q26, O99.4                                                          |
| Drug Abuse                       | 304, 305.2-305.9, 648.3                                              | F11-F16, F18, F19                                                       |
| Gestational Hypertension         | 642.3 (without pre-eclampsia/eclampsia or pre-existing hypertension) | O13, O16 (without pre-eclampsia/eclampsia or pre-existing hypertension) |
| Human Immunodeficiency Virus     | 042, V08                                                             | B20, B24, O98.7, Z21                                                    |
| Mild/Unspecified Pre-Eclampsia   | 642.4, 642.7 (without severe pre-eclampsia/eclampsia)                | O11, O14 (without severe pre-eclampsia/eclampsia)                       |
| Multiple Gestation               | 651, V27.2-V27.8                                                     | O30, O31, Z37.2-Z37.7, Z37.90                                           |
| Placenta Previa                  | 641.0, 641.1                                                         | O44                                                                     |
| Pre-Existing Diabetes Mellitus   | 250, 648.0                                                           | E10, E11, O24.5-O24.7                                                   |
| Pre-Existing Hypertension        | 401-405, 642.0-642.2, 642.7                                          | I10-I13, I15, O10, O11                                                  |
| Previous Cesarean Delivery       | 654.2                                                                | O34.20                                                                  |
| Pulmonary Hypertension           | 416.0, 416.8, 416.9                                                  | I27.0, I27.2, I27.8, I27.9                                              |
| Severe Pre-Eclampsia             | 642.5, 646.6                                                         | O14, O15                                                                |
| Sickle Cell Disease              | 282.4, 282.6                                                         | D56, D57                                                                |
| Systemic Lupus Erythematosus     | 710.0                                                                | M32                                                                     |
