# Supplementary material for: Validation of an obstetric comorbidity index in an external population
Source: PubMed Central journal article supplement — BJOG. 2015 Jan 5;122(13):1748–55. doi: 10.1111/1471-0528.13254 (PMC5006847; doi:10.1111/1471-0528.13254), 2015-01-05
Supplement: BJO-122-1748-s002.pdf [file BJO-122-1748-s002.pdf]

**Appendix S2. ICD Diagnosis Codes for Maternal End Organ Damage**

| <b>Condition</b>                                        | <b>ICD-9-CM Code<br/>(As defined by Bateman et al (6))</b>                                                                                                              | <b>ICD-10-CA Code</b>                                                                                                      |
|---------------------------------------------------------|-------------------------------------------------------------------------------------------------------------------------------------------------------------------------|----------------------------------------------------------------------------------------------------------------------------|
| Acute Heart Failure                                     | 415.0, 427.5, 428.0, 428.1, 428.21, 428.23, 428.31, 428.33, 428.41, 428.43, 428.9, 669.4, 997.1                                                                         | I26.0, I46, I50, I97.8, I97.9, O75.4                                                                                       |
| Acute Liver Disease                                     | 570, 646.7                                                                                                                                                              | K72.0, K72.9, O26.6                                                                                                        |
| Acute Myocardial Infarction                             | 410                                                                                                                                                                     | I21, I22                                                                                                                   |
| Acute Renal Failure                                     | 584, 669.3                                                                                                                                                              | N17, O90.4                                                                                                                 |
| Acute Respiratory Distress Syndrome/Respiratory Failure | 518.5, 518.7, 518.81, 518.82, 518.84, 799.1                                                                                                                             | J80, J95.1, J95.2, J95.3, J95.8, J95.9, J96.0, J96.9, R09.2                                                                |
| Coma                                                    | 250.2, 250.3, 251.0, 572.2, 780.01, 780.03                                                                                                                              | E10.0, E11.0, E15, K72.9, R40.2                                                                                            |
| Delirium                                                | 293                                                                                                                                                                     | F05, F06.0, F06.1, F06.2, F06.3, F06.4, F06.8                                                                              |
| Disseminated Intravascular Coagulation/Coagulopathy     | 286.6, 286.7, 286.9, 287.4, 666.3                                                                                                                                       | D65, D68.3, D68.4, D68.8, D68.9, D69.5, O72.3                                                                              |
| Puerperal Cerebrovascular Disorders                     | 325, 346.6, 348.1, 348.3, 348.5, 430-432 433.01, 433.11, 433.21, 433.31, 433.81, 433.91, 434.01, 434.11, 434.91, 436, 437.1, 437.2, 437.6, 671.5, 674.0, 997.01, 997.02 | G08, G43, G93.1, G93.4, G93.6, G97.8, G97.9, I60-I63, I67.4, I67.6, I67.8, I97.8, I97.9, O22.5, O22.8, O22.9, O87.3, O99.4 |
| Pulmonary Edema                                         | 428.1, 514, 518.4                                                                                                                                                       | I50.1, J81                                                                                                                 |
| Pulmonary Embolism                                      | 415.1, 673                                                                                                                                                              | I26, O88                                                                                                                   |
| Sepsis                                                  | 038, 112.5, 659.3, 785.52, 995.91, 995.92                                                                                                                               | A40, A41, B37.7, O75.3, R57.2, R65.1                                                                                       |
| Shock                                                   | 669.1, 785.5, 995.0, 995.4, 995.94, 998.0, 999.4                                                                                                                        | O75.1, R57, R65.1, T78.0, T78.2, T80.5, T81.1, T88.2, T88.6                                                                |
| Status Asthmaticus                                      | 493.11, 493.21, 493.91                                                                                                                                                  | J45.01, J45.11, J45.81, J45.91                                                                                             |
| Status Epilepticus                                      | 345.3                                                                                                                                                                   | G41                                                                                                                        |
